# Supplementary material
Source: HighWire-hosted journal article supplement (doi:10.1101/rna.037200.112)
Supplement: Revised_Supplemental_Table_2.docx [file Revised_Supplemental_Table_2.docx]

**Supplementary Table 2. The primer sequences for quantitative PCR analysis used in this study.**

| **Name** | **Sequence (5**´–**3**´**)** |
| --- | --- |
| *Siwi* forward | CGCCGAAGTCCACATTTAAAATGCG |
| *Siwi* reverse | TAGCTCGCATCTCGTCGGAGAGGCC |
| *BmAgo3* forward | TGTGATGTTCAAATGTATAATGA |
| *BmAgo3* reverse | CCTTCGTATTCGTCTACTGC |
| *rp49* forward | AGGTATTGACAACAGAGTCC |
| *rp49* reverse | GGAGCATATGACGGGTCTTC |
| *Pao* forward | CGCCATGAAAAGTGGAAGTGCCA |
| *Pao* reverse | TCTCCGTAGAACTCCACCCTTGGTT |
| *L1Bm* forward | CTTTAAGTTCGAGCGCACGTTCCAA |
| *L1Bm* reverse | GACGTAGCGCGTGATGACGTAA |
| *R1Bm* forward | TACCCTCCATTGCACGGGATCT |
| *R1Bm* reverse | AGCACCCTATTGCGGATATACACA |
| *R2Bm* forward | GATTTTGAGGCCTCTGGATGCGT |
| *R2Bm* reverse | GCACAAAACCGTGCTGGAATCTC |
| *SART1* forward | TCGCAGGCAGTTATTGTCAA |
| *SART1* reverse | TCTGCCGTATCGATTTTAGCC |
| *Bmmar6* forward | ATGAAGACTCTAGTGTAGATGACAGG |
| *Bmmar6* reverse | TTCGCGCCTTCACAGCTTTTATCAC |
| *Kabuki* forward | GTCCAACCATGTGCATGGAAACCAAGTTC |
| *Kabuki* reverse | GCACCTGTGTCCACCAAAAAATTTAGTCCA |
| *Judo* forward | CGTACAAAGGAGCCAATGGT |
| *Judo* reverse | CAAATGATCGCGCTACTGAA |
| *Kagayaki* forward | CACTGGTTCCATACGTAACA |
| *Kagayaki* reverse | GGTTTCTGGACGAAGCCAAG |
| *Kokubaru* forward | TACAATGCTCACTGAGAAGG |
| *Kokubaru* reverse | GACTGGGTCATTATAACTACTGG |
| *BmRT16* forward | GTGGATTAGGCGTTTCACTAC |
| *BmRT16* reverse | GTGTGACCACGTGTGTACGCA |
