# Supplementary material
Source: HighWire-hosted journal article supplement (doi:10.1101/rna.037200.112)
Supplement: SuppFigsTables.pdf [file SuppFigsTables.pdf]

## Supplementary Information

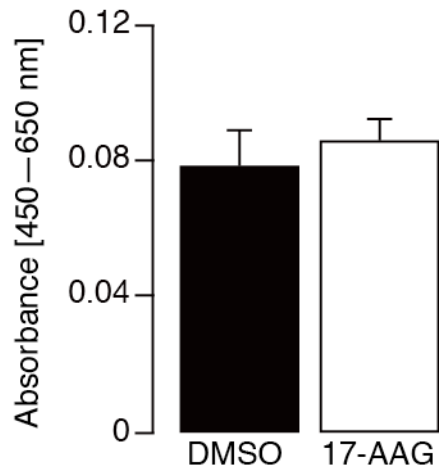

### Supplementary Figure S1. Cell viability is unaffected by 17-AAG

Cell viability of BmN4 cells treated with DMSO or 10  $\mu$ M 17-AAG for 48 hours was assessed by WST-1 assay.

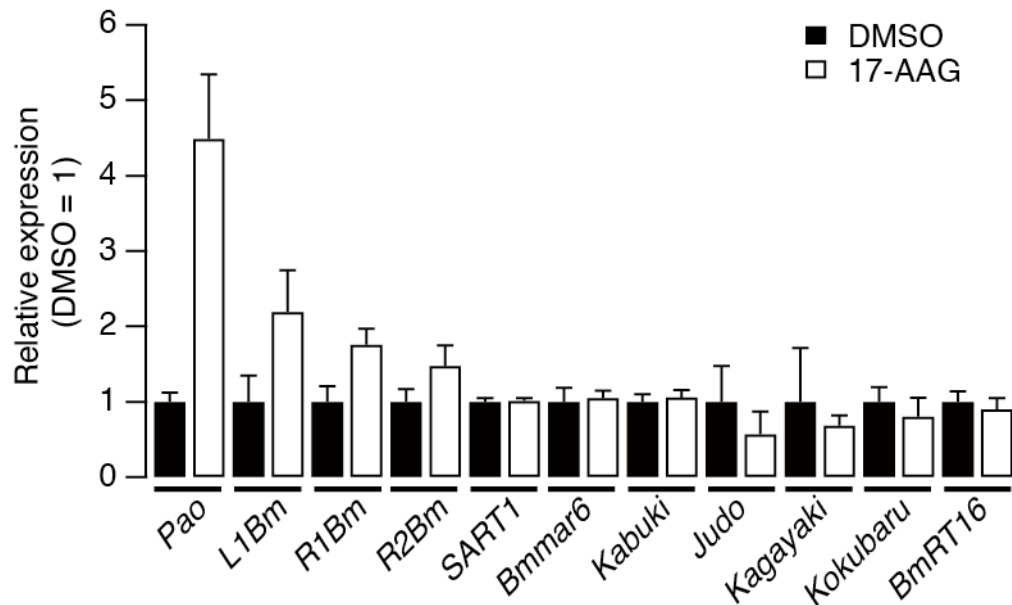

### Supplementary Figure S2. Inhibition of Hsp90 causes transposon de-silencing

Expression of transposon mRNAs in BmN4 cells treated with DMSO or 10  $\mu$ M 17-AAG for 48 hours was measured by qPCR. *rp49* served as an internal control. The average  $\pm$  standard deviations from three independent trials are shown.

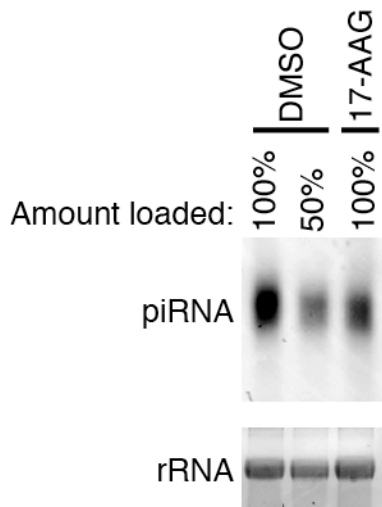

**Supplementary Figure S3. The overall level of piRNAs is reduced by 17-AAG**

Ten microgram of total RNAs from BmN4 cells treated with DMSO or 10  $\mu$ M 17-AAG for 48 hours were resolved by 15% denaturing PAGE and stained with SYBRGold. rRNA was used as a loading control.

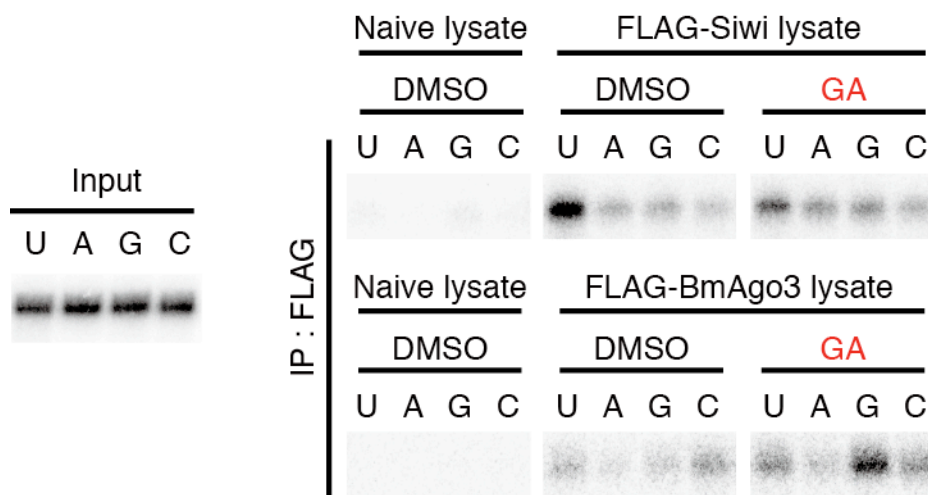

**Supplementary Figure S4. Accurate pre-piRNA loading is impaired by Geldanamycin in vitro**

50-nt 5'-radiolabeled RNAs with 5' U, A, G, or C were incubated in lysates prepared from wild-type BmN4 cells (naive), FLAG-Siwi or FLAG-BmAgo3 expressing cells in the presence or absence of 1 mM Geldanamycin (GA). After immunoprecipitation with anti-FLAG antibody, Siwi or BmAgo3-bound RNAs were detected.

**Supplementary Table 1. Summary of piRNA deep sequencing in this study**

| <b>Library name</b> | <b>Total reads</b> | <b>Total genome mapping</b> | <b>Genome mapping (%)</b> | <b>Total TE mapping</b> | <b>TE mapping (%)</b> |
|---------------------|--------------------|-----------------------------|---------------------------|-------------------------|-----------------------|
| Total_DMSO          | 32031092           | 13330009                    | 41.6                      | 2565560                 | 8.0                   |
| Total_17-AAG        | 27881490           | 10227258                    | 36.7                      | 1829248                 | 6.6                   |
| Siwi_DMSO           | 31831288           | 12118225                    | 38.1                      | 2346582                 | 7.4                   |
| Siwi_17-AAG         | 28287765           | 10954181                    | 38.7                      | 2239138                 | 7.9                   |
| BmAgo3_DMSO         | 29149468           | 14850765                    | 50.9                      | 3873590                 | 13.3                  |
| BmAgo3_17-AAG       | 28893120           | 14805694                    | 51.2                      | 4075341                 | 14.1                  |

TE: Transposable element.

**Supplementary Table 2. The primer sequences for quantitative PCR analysis used in this study.**

| <b>Name</b>             | <b>Sequence (5'–3')</b>       |
|-------------------------|-------------------------------|
| <i>Siwi</i> forward     | CGCCGAAGTCCACATTTAAAATGCG     |
| <i>Siwi</i> reverse     | TAGCTCGCATCTCGTCCGAGAGGCC     |
| <i>BmAgo3</i> forward   | TGTGATGTTCAAATGTATAATGA       |
| <i>BmAgo3</i> reverse   | CCTTCGTATTCGTCTACTGC          |
| <i>rp49</i> forward     | AGGTATTGACAACAGAGTCC          |
| <i>rp49</i> reverse     | GGAGCATATGACGGGTCTTC          |
| <i>Pao</i> forward      | CGCCATGAAAAGTGGAAGTGCCA       |
| <i>Pao</i> reverse      | AACCAAGGGTGGAGTTCTACGGAGA     |
| <i>L1Bm</i> forward     | TTACGTCATCATCACGCGCTACGTC     |
| <i>L1Bm</i> reverse     | CTTTAAGTTCGAGCGCACGTTCCAA     |
| <i>R1Bm</i> forward     | TACCCTCCATTGCACGGGATCT        |
| <i>R1Bm</i> reverse     | TGTGTATATCCGCAATAGGGTGCT      |
| <i>R2Bm</i> forward     | GAGATTCCAGCACGGTTTTGTGC       |
| <i>R2Bm</i> reverse     | GATTTTGAGGCCTCTGGATGCGT       |
| <i>SART1</i> forward    | TCGCAGGCAGTTATTGTCAA          |
| <i>SART1</i> reverse    | GGCTAAAATCGATACGGCAGA         |
| <i>Bmmar6</i> forward   | ATGAAGACTCTAGTGTAGATGACAGG    |
| <i>Bmmar6</i> reverse   | GTGATAAAAGCTGTGAAGGCGCGAA     |
| <i>Kabuki</i> forward   | GTCCAACCATGTGCATGGAAACCAAGTTC |
| <i>Kabuki</i> reverse   | TGGACTAAATTTTTGGTGGACACAGGTGC |
| <i>Judo</i> forward     | CGTACAAAGGAGCCAATGGT          |
| <i>Judo</i> reverse     | CAAATGATCGCGCTACTGAA          |
| <i>Kagayaki</i> forward | CACTGGTTCATACGTAACA           |
| <i>Kagayaki</i> reverse | GGTTTCTGGACGAAGCCAAG          |
| <i>Kokubaru</i> forward | TACAATGCTCACTGAGAAGG          |
| <i>Kokubaru</i> reverse | GACTGGGTCATTATAACTACTGG       |
| <i>BmRT16</i> forward   | GTGGATTAGGCGTTTCACTAC         |
| <i>BmRT16</i> reverse   | GTGTGACCACGTGTGTACGCA         |
